# Supplementary material
Source: PubMed Central journal article supplement (PMC4510986)
Supplement: NIHMS542515-supplement-supplement_1.pdf [file NIHMS542515-supplement-supplement_1.pdf]

**SUPPLEMENTAL DATA – FIGURE LEGENDS**

**Figure S1.** Comparative analysis of TTKG between NC and CY mice at the ages of 5, 10-13 and 24 wk. Comparison performed using the nonpaired *t* test, with data presented as mean±SD; n/group in Table 3.

**Figure S2.** (A) Comparative analyses of urinary excretion of nitrate between NC and CY mice at the ages of 5, 10-13 and 24 wk, and (B) between WT and HT mice at 10-13 wk.  $UE_{NO_3}$  was compared using the nonpaired *t* test and ANOVA, with the data presented as mean±SD; n/group in Table 5.

FIGURE S1

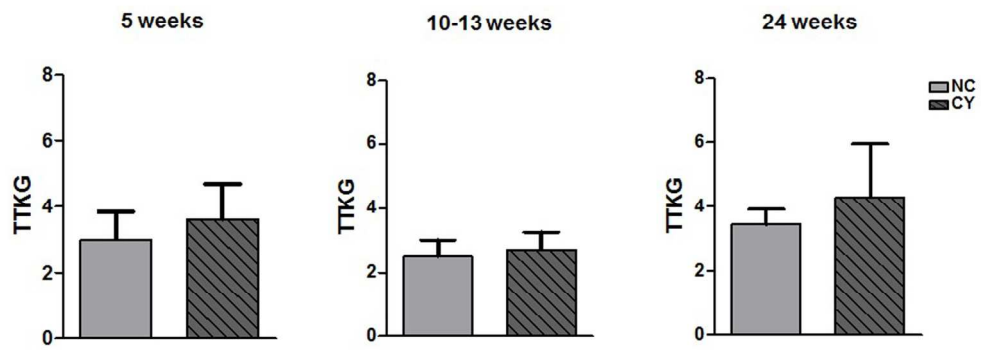

Comparative analysis of TTKG between NC and CY mice at the ages of 5, 10-13 and 24 wk. Comparison performed using the nonpaired t test, with data presented as mean±SD; n/group in Table 3.  
234x105mm (300 x 300 DPI)

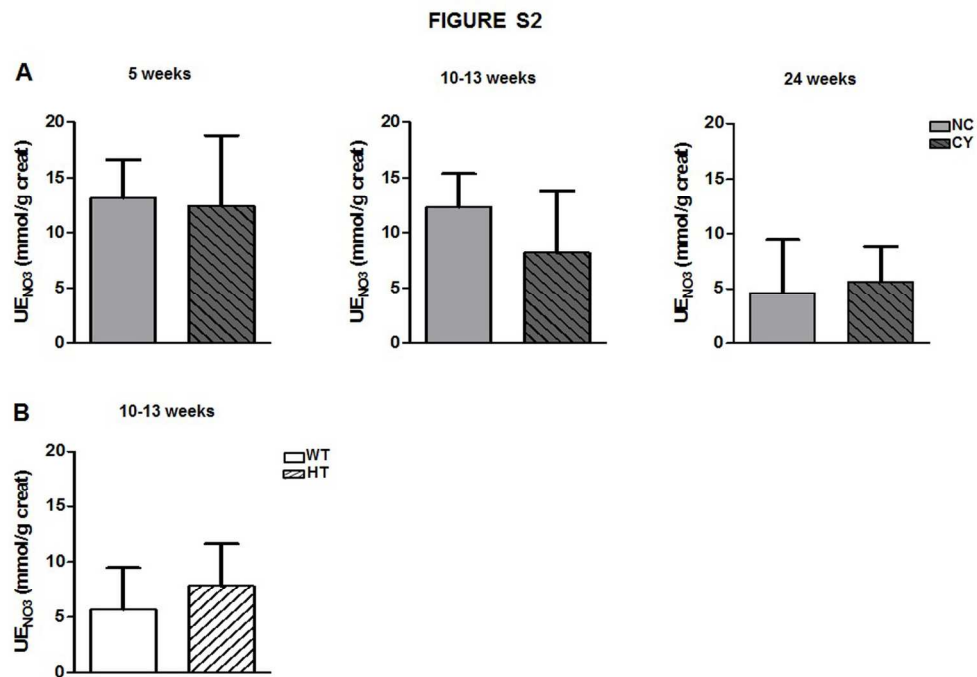

(A) Comparative analyses of urinary excretion of nitrate between NC and CY mice at the ages of 5, 10-13 and 24 wk, and (B) between WT and HT mice at 10-13 wk. UE<sub>NO<sub>3</sub></sub> was compared using the nonpaired t test and ANOVA, with the data presented as mean±SD; n/group in Table 5.  
258x177mm (300 x 300 DPI)
